# Supplementary material
Source: PubMed Central journal article supplement (PMC3652880)
Supplement: jn.112.170993_nutrition170993SupplementaryData.pdf [file jn.112.170993_nutrition170993SupplementaryData.pdf]

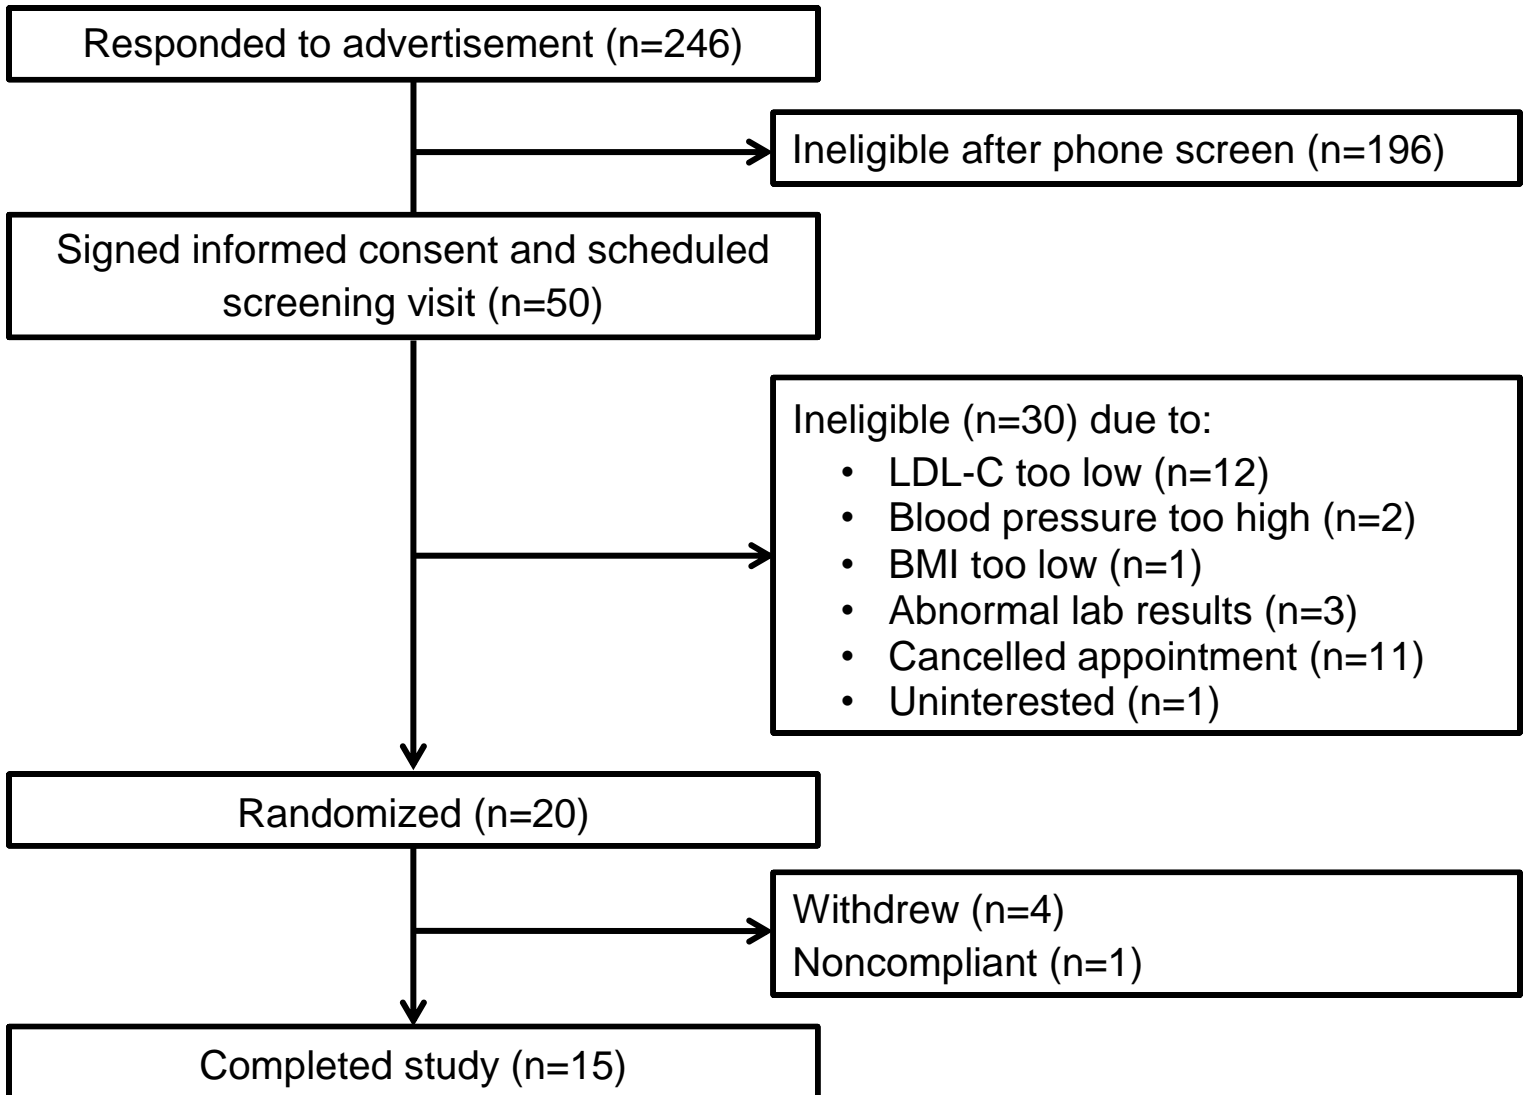

**Supplemental Figure 1.** Participant flow diagram.

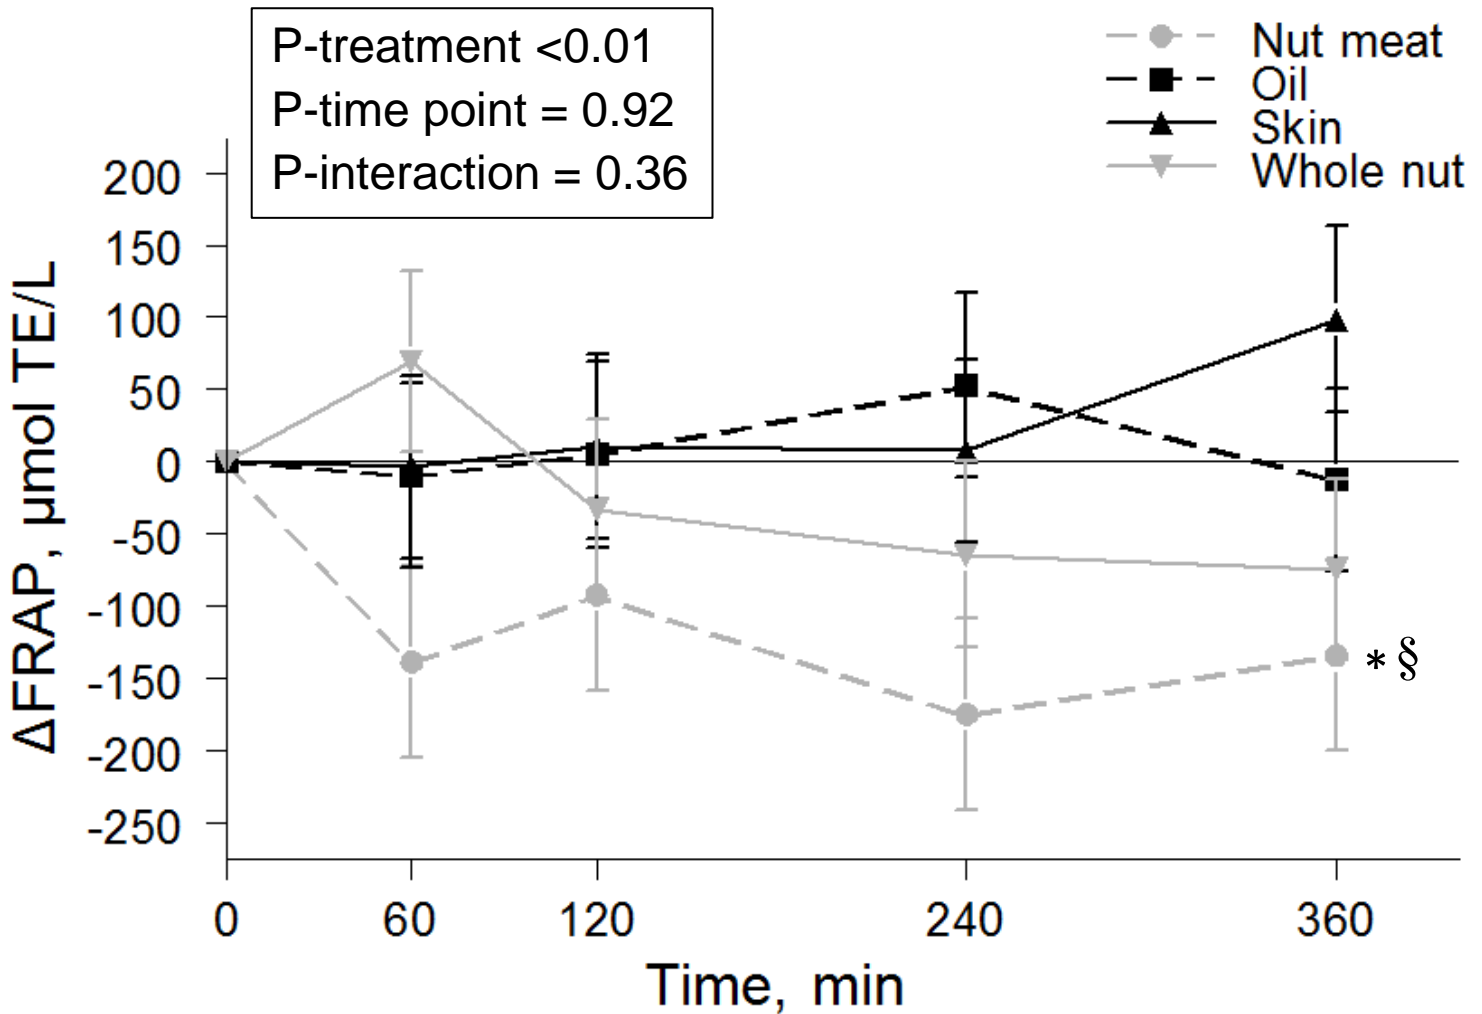

**Supplemental Figure 2.** Change in plasma concentration of FRAP after consumption of each test meal in healthy overweight and obese men and women. Values are least squares means  $\pm$  SEM,  $n = 15$ . Post hoc analyses were conducted using the Bonferroni adjustment for multiple comparisons. \*Compared to oil, §compared to skin;  $P < 0.05$ . Ferric reducing antioxidant potential, FRAP; Trolox equivalents, TE.
